# Supplementary material for: Barriers to the Successful Health Care Transition of Patients with Kidney Disease: A Mixed-Methods Study on the Perspectives of Adult Nephrologists
Source: MDPI journal article supplement (doi:10.3390/children9060803), 2022-05-30
Supplement: s1 [file s1]

### Online survey questions (translated from German)

- 1) Do you have patients age younger than 26 with congenital kidney disease or a kidney disease acquired before the age of 18?
- 2) How many of these have you taken on from paediatric care?
- 3) Please sort your formerly paediatric patients into the following groups:
  - a. CKD 1-4
  - b. Haemodialysis
  - c. Peritoneal dialysis
  - d. Transplant follow up
- 4) How do you experience treating these young patients as compared to your older ones?
  - a. unproblematic
  - b. challenging [open text field for comments]
- 5) Which specific questions or problems do occur in you working with formerly paediatric patients?
  - a. medical (e.g. different treatment regimen, rare condition, etc.)
  - b. social (e.g. questions re work, family planning, disability allowances, etc.)
  - c. psychological (e.g. emotional challenges, delayed emotional development, adherence, etc.)
  - d. doctor-patient-interaction (e.g. involving parents, independent disease management, etc.)
  - e. others, namely... [text]
- 6) Who is taking over the psychosocial care?
  - a. physician
  - b. nurse
  - c. psychosocial staff within the own practice
  - d. psychosocial staff shared with other institutes
  - e. independent / self-employed psychosocial staff
  - f. other, namely... [text]
  - g. unknown
- 7) Would you wish for more information re young people with CKD?
  - a. medical information
  - b. psychological information
  - c. information re social law
  - d. others, namely... [text]
  - e. none
- 8) Would you be willing to participate in an expert-interview on transitioning young adults with a kidney transplant? If yes, please leave your name, centre, and Email-address
- 9) Is there anything else you would like to let us know?
